# Supplementary material for: Commitment Complex Splicing Factors in Cancers of the Gastrointestinal Tract—An In Silico Study
Source: PubMed Central journal article supplement — Bioinform Biol Insights. 2024 Oct 15;18:11779322241287115. doi: 10.1177/11779322241287115 (PMC11483837; doi:10.1177/11779322241287115), 2024-10-15
Supplement: sj-pdf-1-bbi-10.1177_11779322241287115.pdf [file sj-pdf-1-bbi-10.1177_11779322241287115.pdf]

Supplementary  
Figure 1

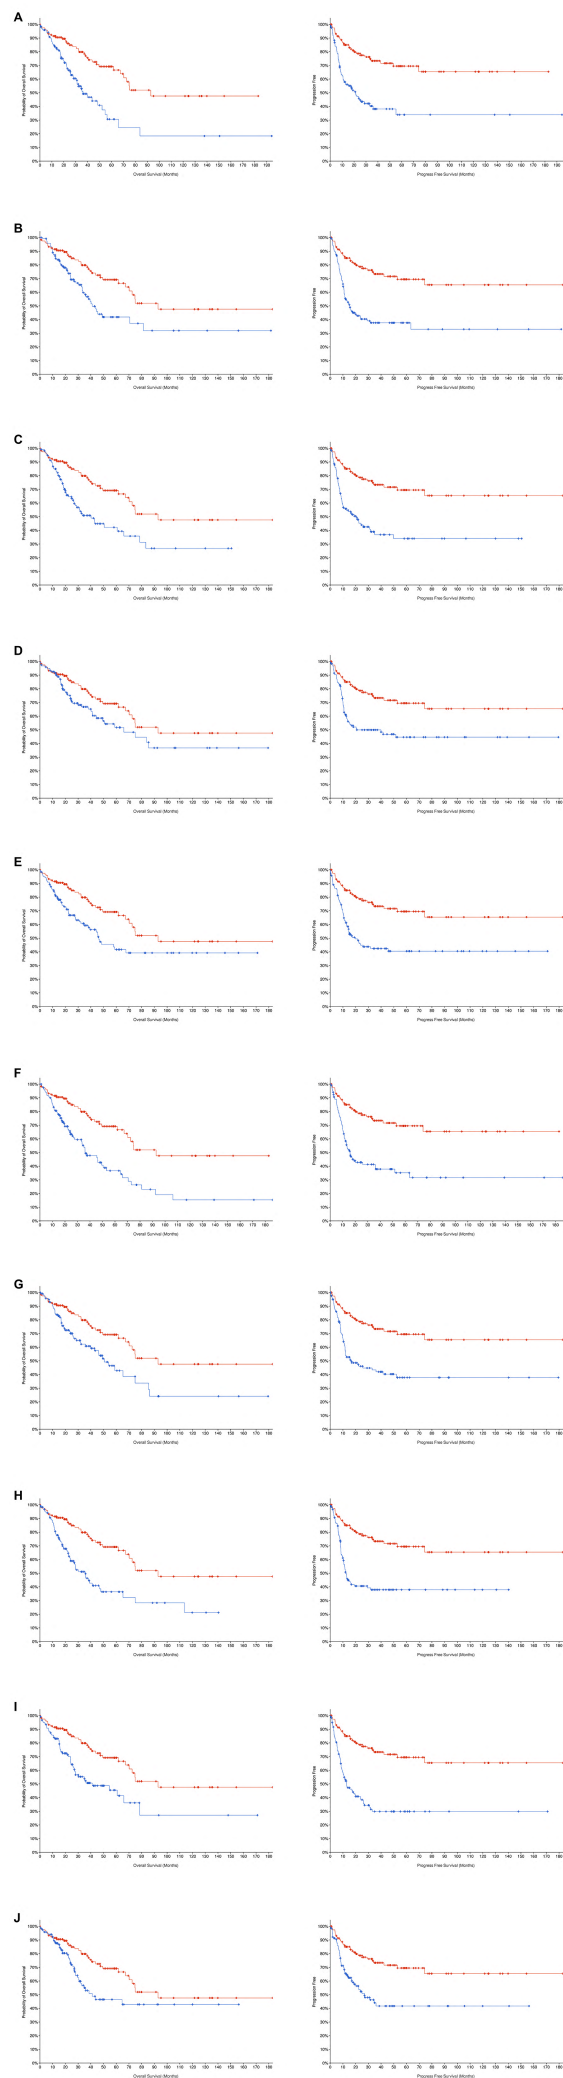

# Suppl. Figure 2

**A**

| Clinical Attribute      | Attribute Type | Statistical Test | p-Value             | q-Value             |
|-------------------------|----------------|------------------|---------------------|---------------------|
| MSI Status              | Sample         | Chi-squared Test | < 10 <sup>-10</sup> | < 10 <sup>-10</sup> |
| Mutation Count          | Sample         | Wilcoxon Test    | < 10 <sup>-10</sup> | < 10 <sup>-10</sup> |
| Fraction Genome Altered | Sample         | Wilcoxon Test    | 3.77E-8             | 1.033E-06           |
| Diagnosis Age           | Patient        | Wilcoxon Test    | 9.910E-4            | 0.0106              |
| Race Category           | Patient        | Chi-squared Test | < 10 <sup>-10</sup> | < 10 <sup>-10</sup> |

**B**

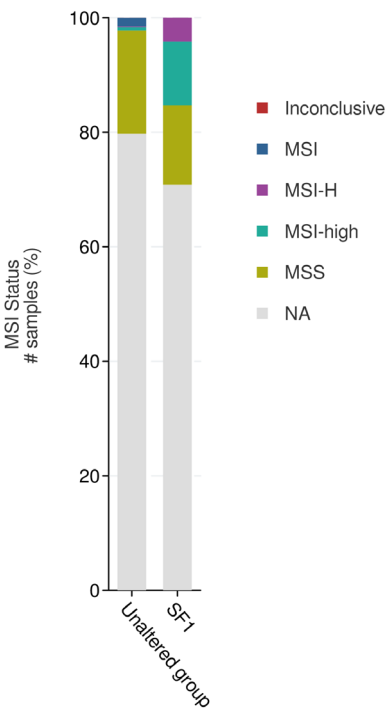

**C**

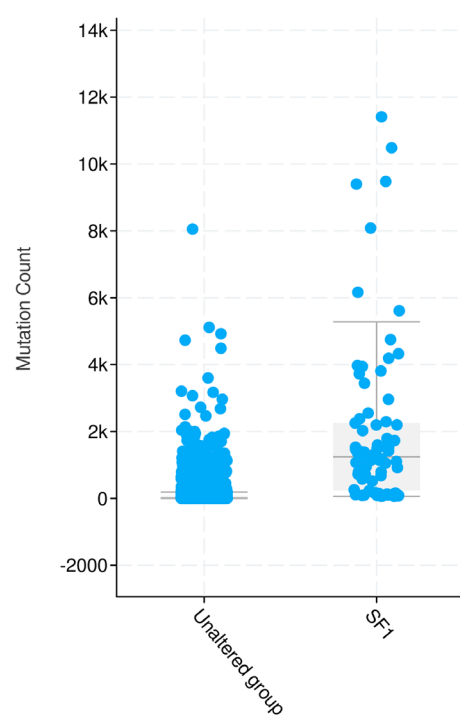

**D**

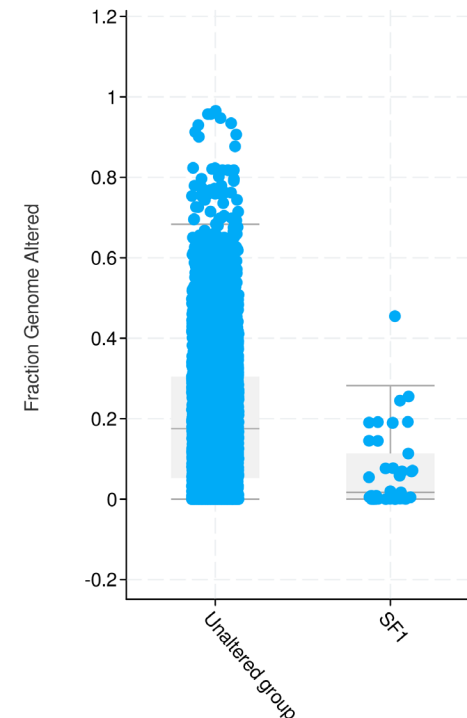

**E**

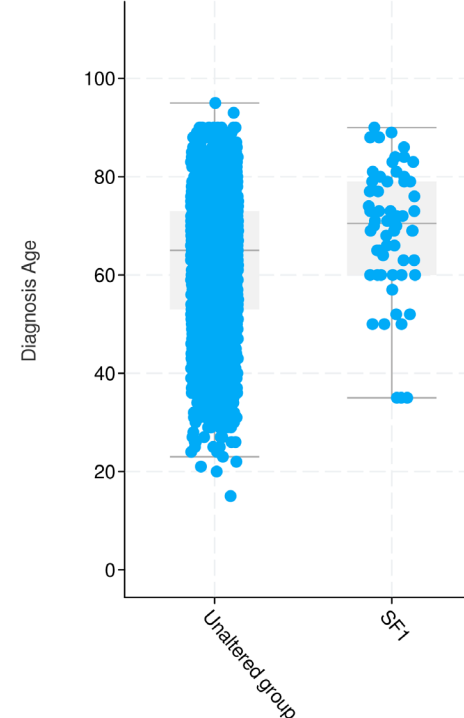

**F**

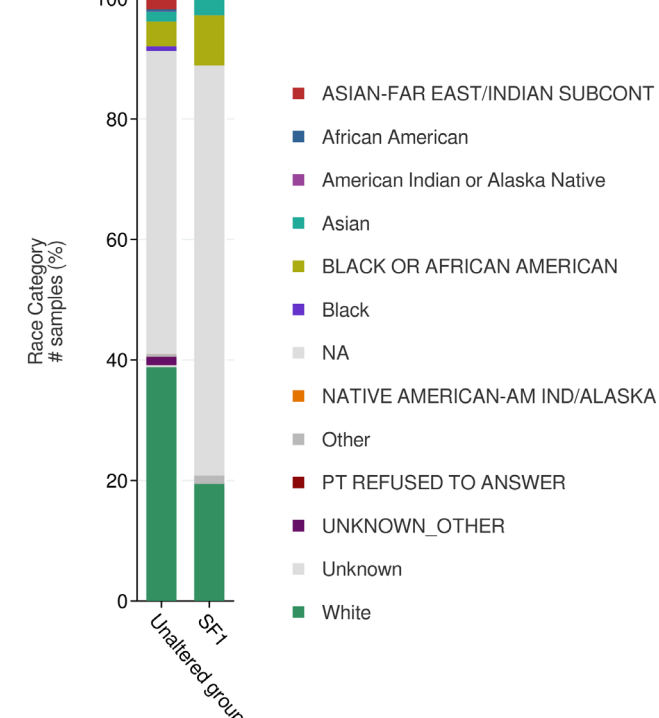

# Suppl. Figure 3

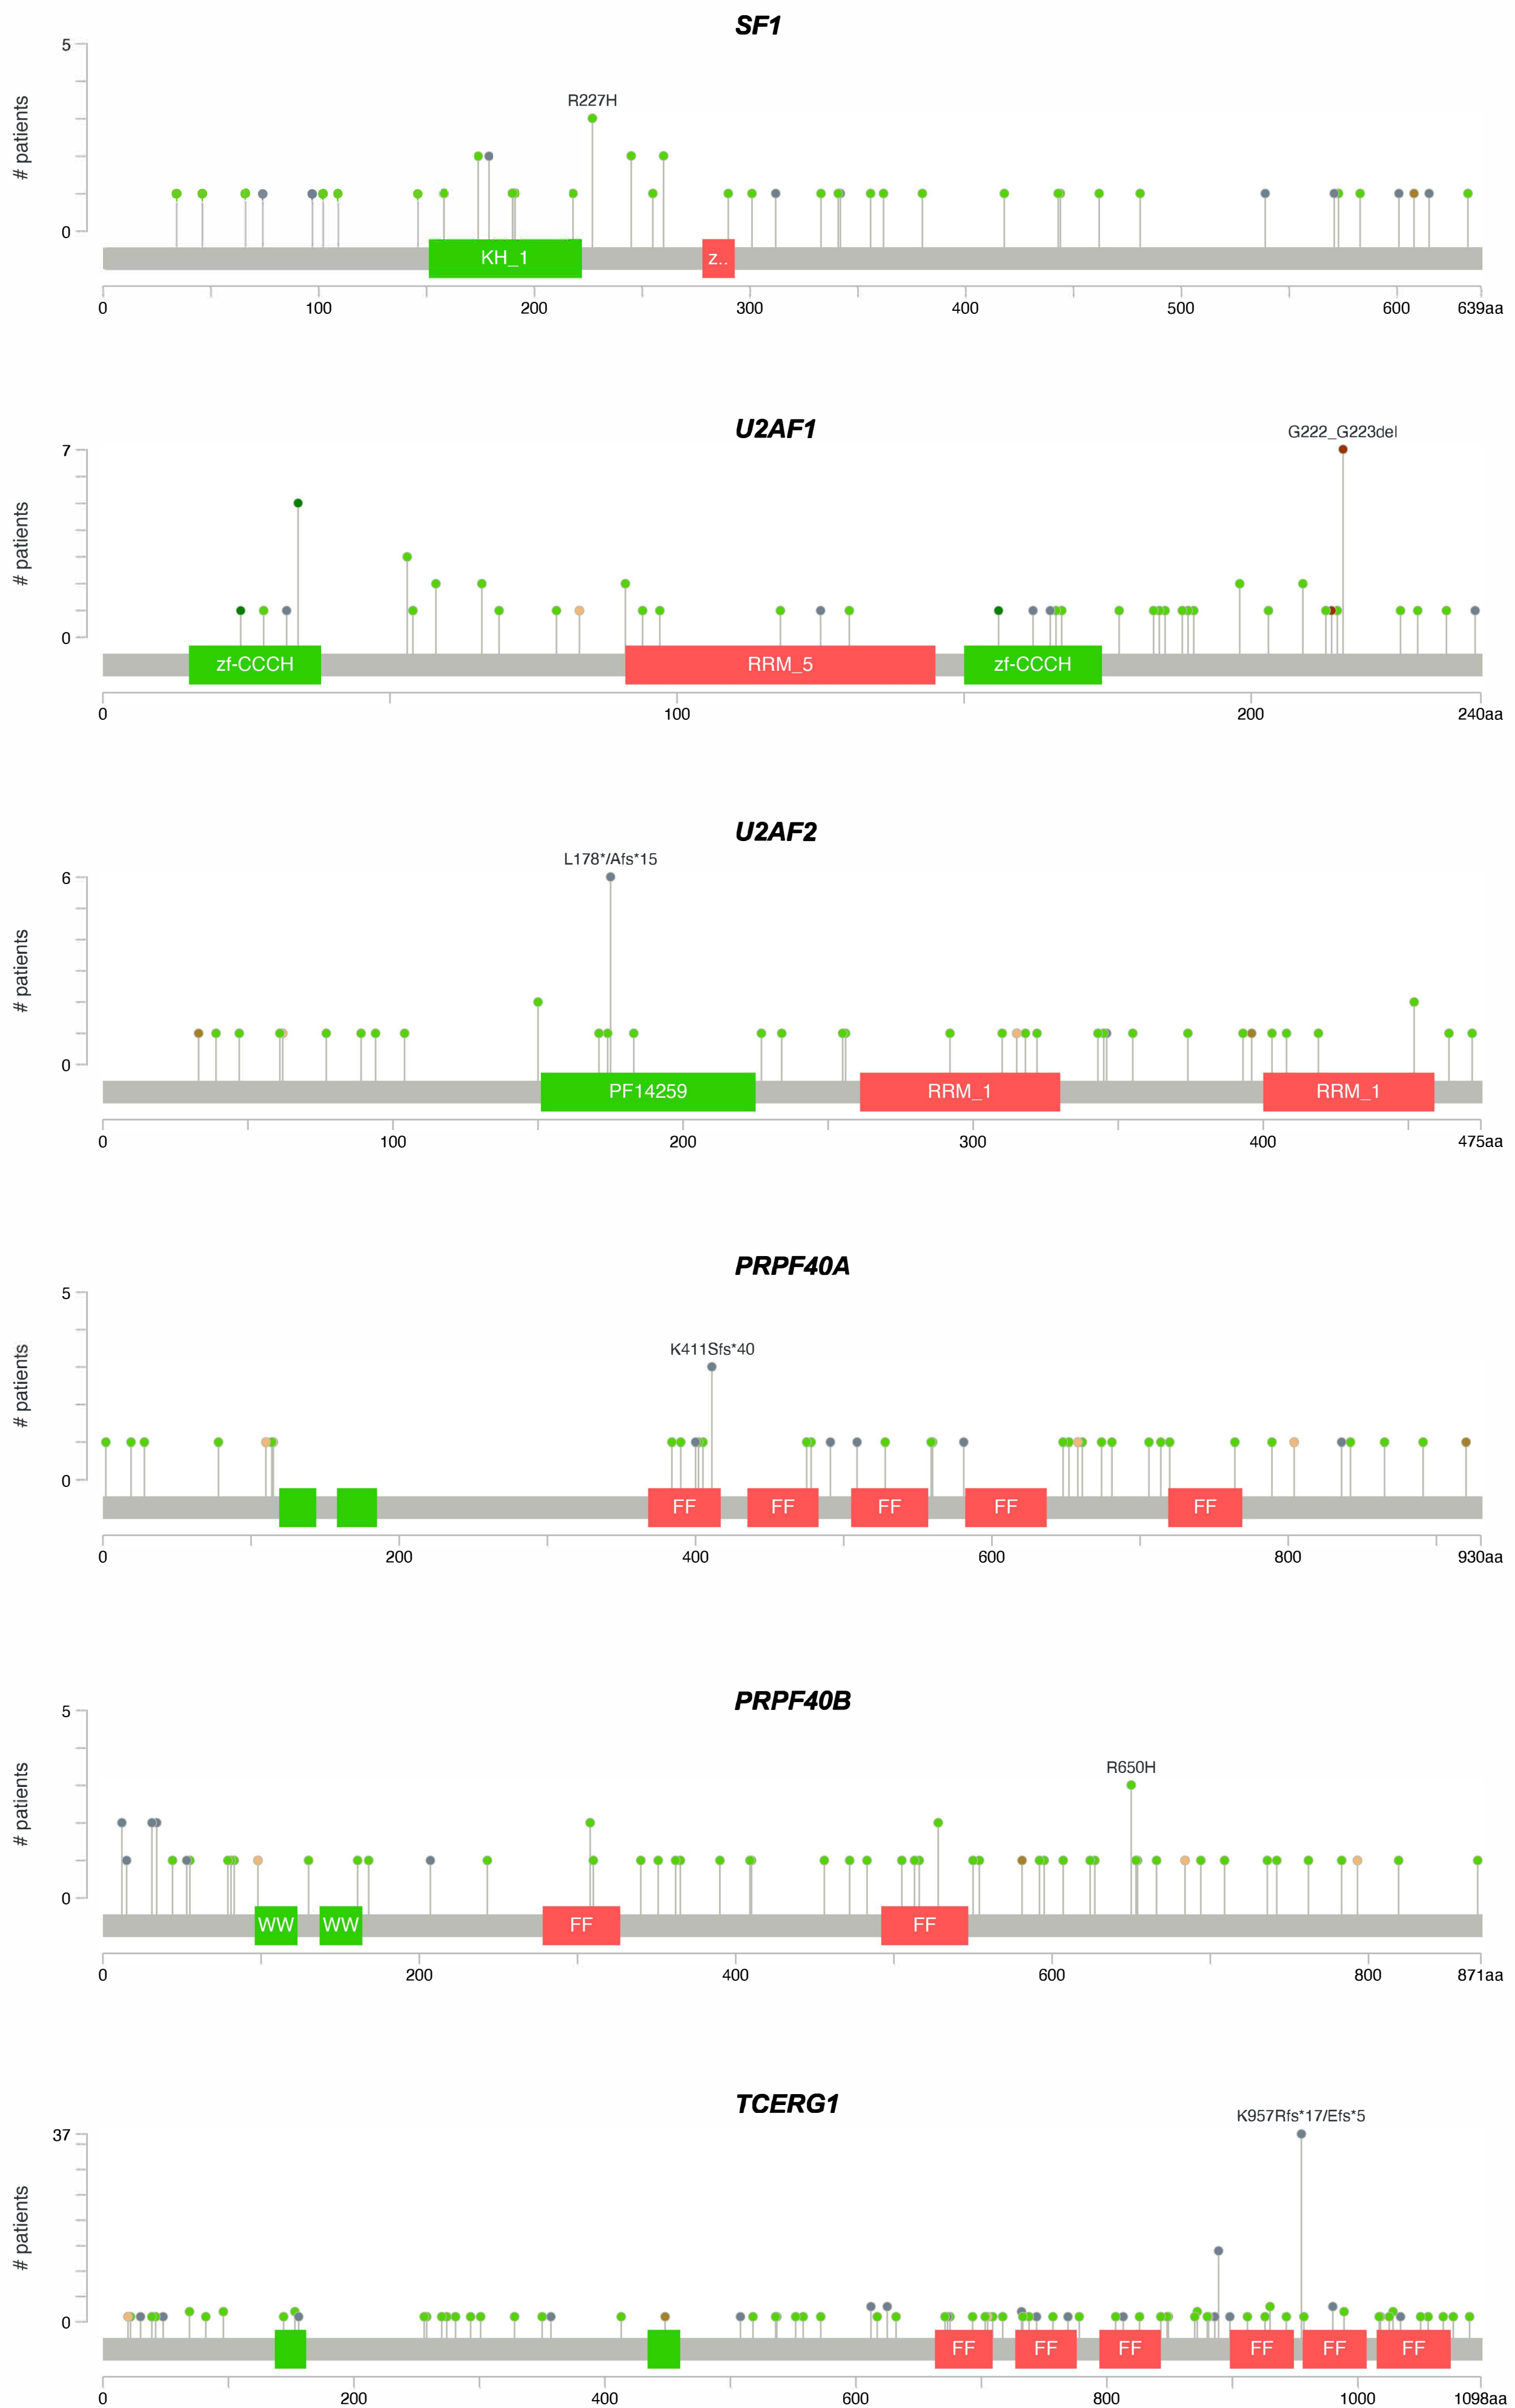

Suppl. Figure 4

**A**

**BRAF/CC**

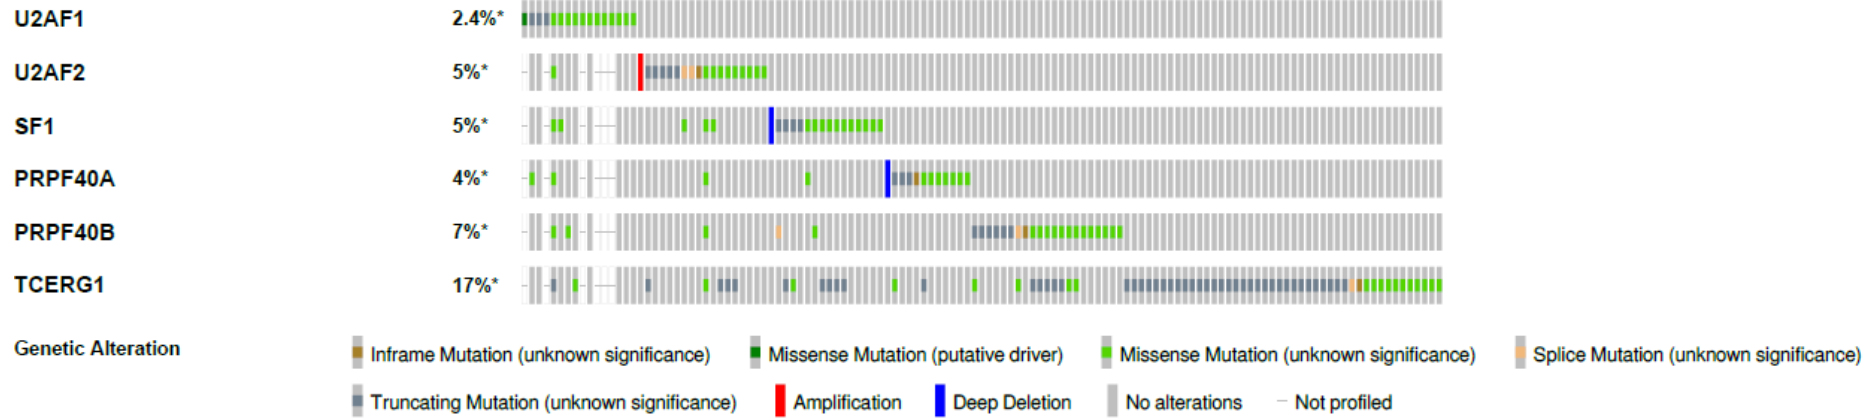

**B**

**BRAF (TCGA)/CC**

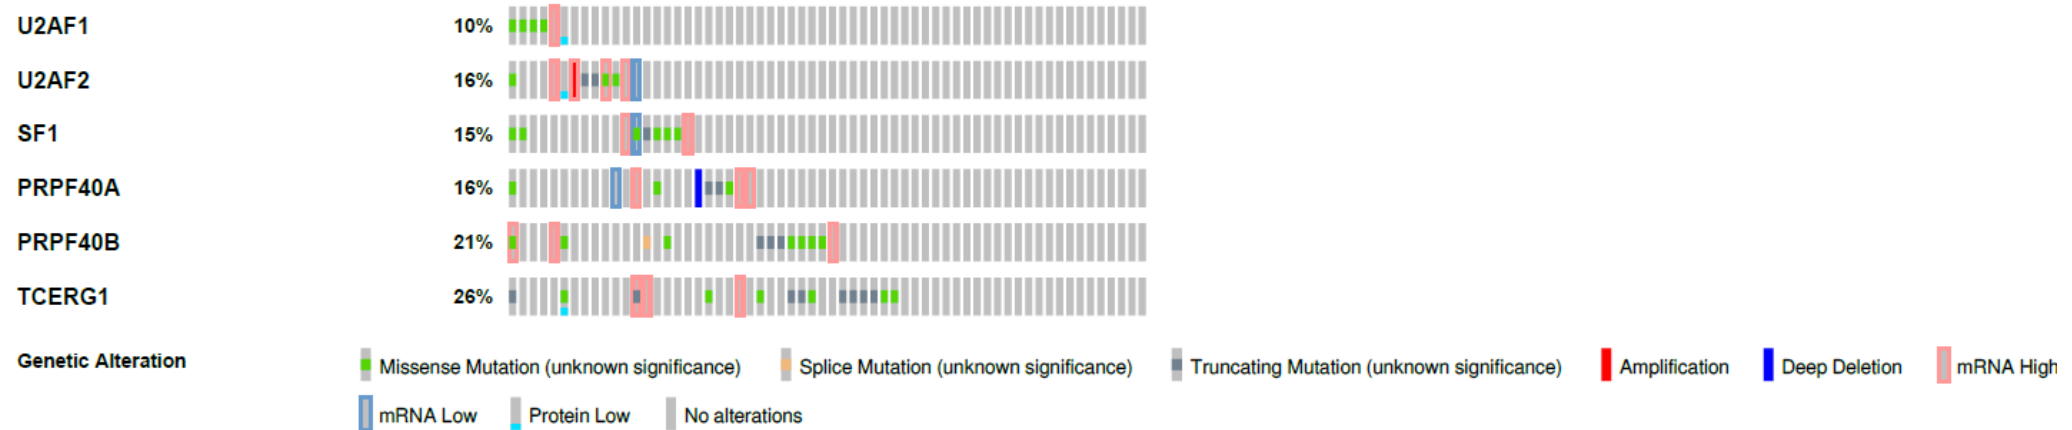







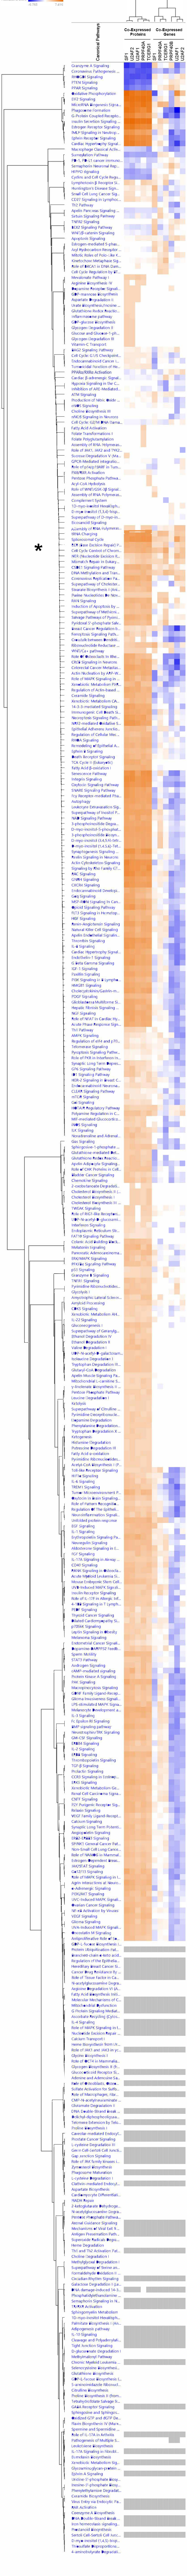



**Supplementary Table 1**

| <b>A</b> | <b>B</b> | <b>Neither</b> | <b>A Not B</b> | <b>B Not A</b> | <b>Both</b> | <b>Log2 Odds Ratio</b> | <b>p-Value</b> | <b>q-Value</b> | <b>Tendency</b> |
|----------|----------|----------------|----------------|----------------|-------------|------------------------|----------------|----------------|-----------------|
| PRPF40B  | TCERG1   | 1481           | 41             | 100            | 16          | 2.531                  | <0.001         | <0.001         | Co-occurrence   |
| SF1      | TCERG1   | 1488           | 34             | 103            | 13          | 2.466                  | <0.001         | <0.001         | Co-occurrence   |
| U2AF2    | TCERG1   | 1493           | 29             | 104            | 12          | 2.571                  | <0.001         | <0.001         | Co-occurrence   |
| SF1      | PRPF40B  | 1543           | 38             | 48             | 9           | 2.929                  | <0.001         | <0.001         | Co-occurrence   |
| PRPF40A  | TCERG1   | 1494           | 28             | 107            | 9           | 2.166                  | <0.001         | 0.002          | Co-occurrence   |
| U2AF2    | PRPF40B  | 1546           | 35             | 51             | 6           | 2.378                  | 0.002          | 0.006          | Co-occurrence   |
| SF1      | PRPF40A  | 1559           | 42             | 32             | 5           | 2.536                  | 0.003          | 0.007          | Co-occurrence   |
| SF1      | U2AF2    | 1555           | 42             | 36             | 5           | 2.362                  | 0.005          | 0.01           | Co-occurrence   |
| U2AF2    | PRPF40A  | 1564           | 37             | 33             | 4           | 2.357                  | 0.012          | 0.02           | Co-occurrence   |

## Supplementary Table 2

| Organ/System          | TCGA PanCancer Atlas study            | No. of patients | Genetic alteration frequency of CC | Genetic + expression level alteration frequency of CC |
|-----------------------|---------------------------------------|-----------------|------------------------------------|-------------------------------------------------------|
| Adrenal Gland         | Adrenocortical Carcinoma              | 89              | 9%                                 | 46%                                                   |
| Biliary Tract         | Cholangiocarcinoma                    | 36              | 6%                                 | 36%                                                   |
| Bladder/Urinary Tract | Bladder Urothelial Carcinoma          | 406             | 15%                                | 39%                                                   |
| Bowel                 | Colorectal Adenocarcinoma             | 526             | 13%                                | 38%                                                   |
| Breast                | Breast Invasive Carcinoma             | 996             | 7%                                 | 34%                                                   |
| CNS/Brain             | Brain Lower Grade Glioma              | 511             | 7%                                 | 39%                                                   |
|                       | Glioblastoma Multiforme               | 378             | 5%                                 | 15%                                                   |
| Cervix                | Cervical Squamous Cell Carcinoma      | 278             | 10%                                | 38%                                                   |
| Esophagus/Stomach     | Esophageal Adenocarcinoma             | 182             | 9%                                 | 32%                                                   |
|                       | Stomach Adenocarcinoma                | 434             | 15%                                | 37%                                                   |
| Eye                   | Uveal Melanoma                        | 80              | 3%                                 | 36%                                                   |
| Head and Neck         | Head and Neck Squamous Cell Carcinoma | 496             | 10%                                | 34%                                                   |
| Kidney                | Renal Clear Cell Carcinoma            | 354             | 10%                                | 29%                                                   |
|                       | Kidney Chromophobe                    | 65              | 2%                                 | 31%                                                   |
|                       | Renal Papillary Cell Carcinoma        | 274             | 4%                                 | 23%                                                   |
| Liver                 | Hepatocellular Carcinoma              | 353             | 5%                                 | 30%                                                   |
| Lung                  | Lung Adenocarcinoma                   | 507             | 15%                                | 37%                                                   |
|                       | Lung Squamous Cell Carcinoma          | 469             | 11%                                | 34%                                                   |
| Lymphoid              | Diffuse Large B-Cell Lymphoma         | 37              | 16%                                | 32%                                                   |
| Myeloid               | Acute Myeloid Leukemia                | 190             | 7%                                 | 25%                                                   |
| Ovary/Fallopian Tube  | Ovarian Serous Cystadenocarcinoma     | 398             | 10%                                | 23%                                                   |
| Pancreas              | Pancreatic Adenocarcinoma             | 175             | 6%                                 | 34%                                                   |
| Pleura                | Mesothelioma                          | 82              | 2%                                 | 29%                                                   |
| Prostate              | Prostate Adenocarcinoma               | 489             | 7%                                 | 27%                                                   |
| Skin                  | Cutaneous Melanoma                    | 363             | 21%                                | 38%                                                   |
| Soft Tissue           | Pheochromocytoma and Paraganglioma    | 161             | 2%                                 | 31%                                                   |
|                       | Sarcoma                               | 253             | 9%                                 | 32%                                                   |
| Testis                | Testicular Germ Cell Tumors           | 144             | 1%                                 | 38%                                                   |
| Thymus                | Thymoma                               | 123             | 2%                                 | 19%                                                   |
| Thyroid               | Thyroid Carcinoma                     | 482             | <1%                                | 16%                                                   |
| Uterus                | Uterine Corpus Endometrial Carcinoma  | 509             | 23%                                | 46%                                                   |
|                       | Uterine Carcinosarcoma                | 56              | 14%                                | 59%                                                   |



Supplementary Table 3

| Driver Gene | A       | B       | Neither | A Not B | B Not A | Both | Log2 Odds Ratio | p-Value | q-Value      | Tendency      |
|-------------|---------|---------|---------|---------|---------|------|-----------------|---------|--------------|---------------|
| APC         | U2AF2   | TCERG1  | 998     | 14      | 49      | 10   | >3              | <0.001  | <0.001       | Co-occurrence |
|             | SF1     | TCERG1  | 998     | 14      | 50      | 9    | >3              | <0.001  | <0.001       | Co-occurrence |
|             | SF1     | PRPF40B | 1022    | 16      | 26      | 7    | >3              | <0.001  | <0.001       | Co-occurrence |
|             | PRPF40A | TCERG1  | 993     | 19      | 51      | 8    | >3              | <0.001  | <0.001       | Co-occurrence |
|             | PRPF40B | TCERG1  | 987     | 25      | 51      | 8    | 2.631           | <0.001  | <0.001       | Co-occurrence |
|             | SF1     | U2AF2   | 1028    | 19      | 20      | 4    | >3              | 0.001   | <b>0.003</b> | Co-occurrence |
|             | SF1     | PRPF40A | 1025    | 19      | 23      | 4    | >3              | 0.002   | <b>0.004</b> | Co-occurrence |
|             | U2AF2   | PRPF40B | 1018    | 20      | 29      | 4    | 2.812           | 0.005   | <b>0.01</b>  | Co-occurrence |
|             | PRPF40A | PRPF40B | 1015    | 23      | 29      | 4    | 2.606           | 0.008   | <b>0.013</b> | Co-occurrence |
|             | U2AF2   | PRPF40A | 1023    | 21      | 24      | 3    | 2.606           | 0.02    | <b>0.03</b>  | Co-occurrence |
| KRAS        | SF1     | TCERG1  | 541     | 11      | 20      | 6    | >3              | <0.001  | <0.001       | Co-occurrence |
|             | PRPF40A | TCERG1  | 544     | 8       | 21      | 5    | >3              | <0.001  | <0.001       | Co-occurrence |
|             | SF1     | PRPF40B | 554     | 13      | 7       | 4    | >3              | <0.001  | <0.001       | Co-occurrence |
|             | U2AF2   | TCERG1  | 542     | 10      | 22      | 4    | >3              | 0.002   | <b>0.008</b> | Co-occurrence |
|             | U2AF2   | PRPF40A | 554     | 11      | 10      | 3    | >3              | 0.003   | <b>0.008</b> | Co-occurrence |
|             | PRPF40B | TCERG1  | 544     | 8       | 23      | 3    | >3              | 0.011   | <b>0.026</b> | Co-occurrence |
| TP53        | PRPF40A | TCERG1  | 822     | 11      | 31      | 3    | 2.854           | 0.015   | 0.148        | Co-occurrence |
|             | U2AF2   | PRPF40A | 841     | 12      | 12      | 2    | >3              | 0.02    | 0.148        | Co-occurrence |
|             | SF1     | TCERG1  | 818     | 15      | 31      | 3    | 2.4             | 0.03    | 0.15         | Co-occurrence |
| BRAF        | PRPF40B | TCERG1  | 195     | 15      | 57      | 11   | 1.327           | 0.033   | 0.268        | Co-occurrence |



1 **Supplementary Figure Legends & Table Legends**

2 **Supplementary Fig 1.** Comparing equal number of unaltered (randomized samples) with  
3 altered patient samples. Overall survival (left) ( $q$  is between  $1.79e-05$  and  $0.0187$  for all except  
4 D,  $q = 0.0963$ ) and progression free survival (right) ( $q$  is in between  $1.38e-09$  and  $2.95e-04$  for  
5 all) of patients with or without genetic alterations in E-complex genes. For each panel, data was  
6 obtained from a total of 132 patients with at least one alteration in the 6 queried E-complex  
7 genes (Altered group, indicated by the red curve), and a randomized cohort of 132 patients  
8 derived from 1219 patients without any alterations in any E-complex factors (Unaltered group,  
9 indicated by the blue curve).

10

11 **Supplementary Fig 2.** Selected clinical attributes significantly associated with SF1 mutations.  
12 Altered group (patients with *SF1* mutations) and Unaltered group (patients with no mutations in  
13 any E-complex factor) are compared for MSI (microsatellite instability) profile (A and B),  
14 Mutation Count (A and C), Fraction Genome Altered (A and D), Diagnosis Age (A and E) and  
15 Race Category or demographic profile (A and F). Patients with *SF1* mutations (Altered group)  
16 had lower mean levels of genome alterations, higher mutation count and diagnosis age and  
17 different MSI (microsatellite instability) and demographic profile.

18

19 **Supplementary Fig 3.** Location and frequency of genetic mutations in SF1, U2AF1, U2AF2,  
20 PRPF40A, PRPF40B and TCERG1. The horizontal bars represent the amino acid length of  
21 each protein while red and green boxes indicate specific functional motifs such as KH-1, zf-  
22 CCCH or RRM domains. The height of each lollipop indicates the frequency of mutations in  
23 patients. Green lollipops indicate missense mutations, gray indicates truncating mutations,  
24 brown indicates in-frame mutations, orange indicates splice mutations and purple indicates  
25 fusion mutations.

26



27 **Supplementary Fig 4.** Oncoprint showing incidence of genetic alterations of U2AF1, U2AF2,  
28 SF1, PRPF40A, PRPF40B and TCERG1 in (A) BRAF cohorts from all bowel cancer studies and  
29 (B) BRAF cohort from TCGA PanCancer Atlas database.

30

31 **Supplementary Fig 5.** Heat map derived from QIAGEN Ingenuity Pathway Analysis (IPA) using  
32 gene list of co-expressed mRNAs associated with U2AF1, U2AF2, SF1, PRPF40A, PRPF40B  
33 and TCERG1 in cancers of the esophagus, stomach and bowel (left) and pancreas and liver  
34 (right). Compare pathways with Fig 5C and Supplementary Fig 6.

35

36 **Supplementary Fig 6.** IPA analysis using protein and mRNA co-expression data associated  
37 with U2AF1, U2AF2, SF1, PRPF40A, PRPF40B and TCERG1 in bowel cancers. The full length  
38 of the heat map (same heat map as in Fig 5C) is shown. Lower portion of IPA heat map  
39 (marked with \*) indicates upregulated pathways with lower z-scores. Left 5 lanes are derived  
40 from gene lists of proteins co-expressed with SF1, U2AF2, U2AF1, PRPF40A and TCERG1.  
41 Right 6 lanes are derived from mRNA gene lists co-expressed with SF1, PRPF40A, TCERG1,  
42 PRPF40B, U2AF1 and U2AF2.

43

44 **Supplementary Table 1.** Co-occurrence tendency of two Commitment Factor (CC) gene  
45 mutations in tumors. A  $q$  value of  $< 0.05$  indicates significant co-occurrence in tumor tissue of  
46 mutated genes listed under column A and B.

47

48 **Supplementary Table 2.** Incidence of U2AF1, U2AF2, SF1, PRPF40A, PRPF40B and  
49 TCERG1 alterations in different cancers listed in cBioPortal. Genetic alterations are from all  
50 non-redundant studies of each type of cancer. Genetic plus expression level alteration  
51 frequency is derived from TCGA, PanCancer Atlas study of each type of cancer.

52



53 **Supplementary Table 3.** Co-occurrence tendency of two Commitment Factor (CC) gene  
54 mutations in tumors from patients in the *APC*, *KRAS*, *TP53* or *BRAF* cohorts. A *q* value of <  
55 0.05 indicates significant co-occurrence (in bold) in tumor tissue of mutated genes listed under  
56 column A and B.

57

58

59

60

61

62

63

64

65

66

67

68

69

70

71

72

73

74

75

76

77

78



79 **Supplementary Methods**

80 ***(1) Survival curves with equal number of patients in altered and unaltered groups.***

81 Survival data was downloaded from cBioPortal by clicking the download icon and Data tab on  
82 the right side of the survival curves, and lists of case ID for both the altered (132 cases) and  
83 unaltered group (1219 cases) were obtained. Sample ID was downloaded separately from the  
84 Download tab of the query. Subsequently, ten sub-lists from the sample ID list of the unaltered  
85 group were generated using the randomize function in Excel, each containing 132 sample IDs.  
86 The 6 E-complex genes were then queried specifically in patient sets defined by these 132  
87 altered and 132 randomly generated unaltered sample IDs, generating overall and progression  
88 free survivals of patients with or without any genetic alterations in E-complex genes. *P* and *q*-  
89 values were computed for each of these survival curves.

90

91 ***(2) TCGA PanCancer Atlas Study; Bowel Cancer***

92 cBioPortal also reports changes in mRNA and protein levels in human cancer tissues in specific  
93 TCGA PanCancer Atlas studies. Thus, for each type of GI cancer, we separately examined their  
94 cognate TCGA PanCancer Atlas study. Each TCGA PanCancer Atlas study was queried for CC  
95 factor alteration in genetic (mutation/structural variant/putative copy-number alterations from  
96 GISTIC), expression level (mRNA expression z-scores relative to diploid samples (RNA Seq V2  
97 RSEM)) and protein/phosphoprotein level (Protein expression z-scores (mass spectrometry by  
98 CPTAC)) changes.

99

100 ***(3) Generation of driver gene APC, TRP53, KRAS or BRAF cohorts.***

101 cBioPortal database was used to investigate how genetic changes in CC factors associate with  
102 specific driver genes in colorectal cancer patients. Four different cohorts of bowel cancer  
103 patients, each having genetic alterations in the driver genes *APC*, *TRP53*, *KRAS* or *BRAF* were  
104 isolated and examined for CC alterations.



105 To generate the APC cohort, all non-redundant bowel cancer studies were selected from  
106 cBioPortal [leaving out the 2 overlapping studies on Colorectal Adenocarcinoma (TCGA,  
107 Firehose Legacy and TCGA, Nature 2012 studies)] and queried for genetic alterations in *APC*.  
108 68% of bowel cancer patients (or 4422 patients) had genetic changes in their *APC* gene (Table  
109 2). Of these, a cohort of 4393 patients were selected that only carried *APC* gene mutations  
110 (excluding gene amplifications or deletions). The 4393 patient samples were queried for genetic  
111 alterations in the six CC factors. CC factors were altered in 4% (177) of the patients carrying  
112 *APC* mutations.

113 Similarly, we selected for a cohort of patients with *KRAS* mutations. 43% (2796 patients)  
114 of bowel cancer patients had *KRAS* mutation (Table 1B). Of this, a *KRAS* cohort of 2737  
115 patients, 4% (106 patients) had mutations in CC factors. 66% (4302 patients) with bowel  
116 cancers had *TP53* mutations. Of these 3% (123 patients) also had CC factor mutations (Table  
117 1B).

118 *BRAF* gene was altered in a lower proportion, 10% (670 patients), of bowel cancer  
119 patients but of these, a higher fraction, 19% (127 patients), carried CC mutations (Table 1B).  
120 We also queried the TCGA PanCancer Atlas dataset (colorectal adenocarcinoma) for *BRAF*  
121 alterations (Table 1B and Figure 4E). In this study of 594 patients, *BRAF* was altered (with  
122 mutated *BRAF* plus expression level changes) in 19% (112 patients) of the patients. Of these  
123 112 patients, 62 patients carried only *BRAF* gene mutations and constituted the *BRAF*/TCGA  
124 cohort (Table 1B). 61% (38 patients) of the *BRAF*/TCGA cohort, also had alterations in CC  
125 factors, with MACR patients having the highest alteration rates in CC genes (Figure 4E).

126

#### 127 **(4) Genes co-expressed with CC factors and IPA.**

128 The bowel TCGA PanCancer Atlas database in cBioPortal was queried for RNAs and proteins  
129 whose expression levels correlate with each CC factor. For example, to identify genes in bowel  
130 cancers that are significantly co-expressed with *SF1*, the TCGA PanCancer Atlas dataset



131 (Colorectal adenocarcinoma) was queried for SF1 followed by co-expression data. The RNA co-  
132 expression data in cBioPortal is derived from RNA sequencing from 592 patient samples. A list  
133 of 19880 genes whose RNA levels positively or negatively correlated with *SF1* was obtained,  
134 out of which the expression correlation of 9576 genes were significant ( $q$ -value  $< 0.05$ ). This list  
135 of 9576 genes was designated co-expressed with *SF1*. Similar co-expression gene lists ( $q$ -value  
136  $< 0.05$ ) were obtained for each CC factor: U2AF2, U2AF1, PRPF40A, PRPF40B and TCERG1.

137

138 The Colorectal adenocarcinoma (TCGA PanCancer Atlas) dataset also allowed for the query for  
139 proteins that are co-expressed with individual CC factors (example of NUDT21 co-expression  
140 with SF1,  $q = 6.53e-21$ , Figure 5B). The protein co-expression data is derived from CPTAC  
141 (NCI's Clinical Proteomic Tumor Analysis Consortium) mass spectrometry of 84 samples. Mass  
142 spectroscopy CPTAC sample data is available for SF1, U2AF1, U2AF2, PRPF40A and  
143 TCERG1 but not for PRPF40B. We generated a list of 5520 proteins that co-expressed with  
144 SF1, of which 3413 proteins were significantly co-expressed ( $q$ -value  $< 0.05$ ). Similar queries  
145 generated gene lists for protein co-expression for each of the other CC factors.

146

147 We utilized the 5 lists of proteins co-expressed with each of the CC factors (SF1, U2AF1,  
148 U2AF2, PRPF40A and TCERG1) together with the 6 lists of mRNAs co-expressed with each of  
149 the CC factors (SF1, U2AF1, U2AF2, PRPF40A, PRPF40B and TCERG1) to simultaneously  
150 perform QIAGEN Ingenuity Pathway Analysis (IPA).

151
